# Supplementary material
Source: PubMed Central journal article supplement (PMC3925739)
Supplement: cc-13-78-s01.pdf [file cc-13-78-s01.pdf]

## **Supplemental Material to:**

**Alexis Forterre, Audrey Jalabert, Karim Chikh, Sandra Pesenti, Vanessa Euthine, Aurélie Granjon, Elizabeth Errazuriz, Etienne Lefai, Hubert Vidal, and Sophie Rome**

**Myotube-derived exosomal miRNAs downregulate Sirtuin1 in myoblasts during muscle cell differentiation**

**Cell Cycle 2013; 13(1)**

**<http://dx.doi.org/10.4161/cc.26808>**

**<http://www.landesbioscience.com/journals/cc/article/26808>**

Supplementary Table 1: Subsets of microRNAs significantly enriched in exosomes from C2C12 myoblasts and myotubes. MicroRNAs found both in myoblast- and myotube-secreted exosomes are indicated in bold

|                       | <i>p</i> -values<br>(Student t-<br>test) | Mean Ct values<br>(myoblasts) | SEM     | Mean Ct<br>values<br>(exosomes) | SEM     |
|-----------------------|------------------------------------------|-------------------------------|---------|---------------------------------|---------|
| <b>MYOBLASTS</b>      |                                          |                               |         |                                 |         |
| <b>mmu-miR-150</b>    | 0.01111397                               | 29.73193666                   | 0.32636 | 24.65900316                     | 0.75094 |
| <b>mmu-miR-21*</b>    | 0.00315996                               | 31.45101495                   | 0.17763 | 28.63471707                     | 0.30466 |
| mmu-miR-223           | 0.00553208                               | 33.44534316                   | 0.70878 | 24.01019832                     | 1.2224  |
| mmu-miR-33*           | 0.0136745                                | 30.08233222                   | 0.46367 | 27.52414449                     | 0.34566 |
| <b>mmu-miR-342-3p</b> | 0.02606594                               | 25.62269942                   | 0.27824 | 23.57483118                     | 0.45482 |
| mmu-miR-381           | 0.0216345                                | 38.26858737                   | 1.51705 | 31.01236264                     | 0.96933 |
| mmu-miR-383           | 0.01469653                               | 34.93504206                   | 0.54154 | 29.48879672                     | 0.97123 |
| mmu-miR-410           | 0.00508886                               | 37.90206606                   | 0.57847 | 32.34523645                     | 0.74898 |
| <b>mmu-miR-449c</b>   | 0.04544337                               | 30.83007554                   | 0.83238 | 27.55928078                     | 0.31175 |
| mmu-miR-465b-5p       | 0.00709163                               | 34.18456346                   | 0.37332 | 29.13328903                     | 0.69173 |
| <b>mmu-miR-467b*</b>  | 0.01156921                               | 30.84043766                   | 0.33331 | 27.193937                       | 0.59803 |
| <b>mmu-miR-678</b>    | 0.02286224                               | 29.32265947                   | 0.16368 | 25.74720764                     | 0.62098 |
| <b>mmu-miR-704</b>    | 0.00022615                               | 30.62445365                   | 0.26128 | 24.2145301                      | 0.35648 |
| mmu-miR-709           | 0.04501476                               | 17.71281376                   | 0.29611 | 16.47453443                     | 0.31115 |
| mmu-miR-720           | 0.02901516                               | 20.71683271                   | 0.4054  | 18.75519085                     | 0.42565 |
| mmu-miR-760           | 0.04061276                               | 25.86087273                   | 0.43337 | 24.18342402                     | 0.33261 |
| <b>mmu-miR-764-5p</b> | 0.01131494                               | 30.30920238                   | 0.1246  | 24.98703855                     | 0.6294  |
| <b>mmu-miR-801</b>    | 0.04718148                               | 28.11289774                   | 0.13548 | 20.87447695                     | 1.64649 |
| <b>mmu-miR-804</b>    | 0.01009687                               | 35.08541503                   | 0.15569 | 28.90762803                     | 0.70698 |
| <b>mmu-miR-877*</b>   | 0.00238101                               | 25.28199433                   | 0.29944 | 22.07136867                     | 0.34774 |
| mmu-miR-99b*          | 0.01373419                               | 27.48045854                   | 0.31252 | 25.50626224                     | 0.3473  |
| <b>rno-miR-345-3p</b> | 0.0119035                                | 30.80464758                   | 0.3073  | 28.4669534                      | 0.40575 |
| rno-miR-664           | 0.00436716                               | 25.94429283                   | 0.14903 | 24.53249387                     | 0.18185 |
| <b>MYOTUBES</b>       |                                          |                               |         |                                 |         |
|                       | <i>p</i> -values<br>(Student t-<br>test) | Mean Ct values<br>(myotubes)  | SEM     | Mean Ct<br>values<br>(exosomes) | SEM     |
| <b>mmu-miR-150</b>    | 0.00381949                               | 30.91098081                   | 0.33837 | 26.82331952                     | 0.10481 |
| mmu-miR-181a-1*       | 0.02336187                               | 29.00600754                   | 0.37331 | 26.81617704                     | 0.08372 |
| mmu-miR-183*          | 0.02628997                               | 26.85614034                   | 0.29741 | 25.48941596                     | 0.25706 |
| mmu-miR-18a*          | 0.0087759                                | 30.06166625                   | 0.47057 | 27.07580574                     | 0.38219 |
| mmu-miR-191*          | 0.01364324                               | 31.88898231                   | 0.36891 | 28.68912039                     | 0.57353 |
| <b>mmu-miR-21*</b>    | 0.00654415                               | 30.09696332                   | 0.39402 | 27.37946101                     | 0.29787 |
| <b>mmu-miR-342-3p</b> | 0.01825107                               | 25.16238333                   | 0.04015 | 22.53062992                     | 0.37009 |
| <b>mmu-miR-449c</b>   | 0.01157386                               | 32.22083304                   | 0.38166 | 27.88304309                     | 0.70514 |
| <b>mmu-miR-467b*</b>  | 0.00278106                               | 30.16823336                   | 0.3959  | 26.54188023                     | 0.38422 |
| mmu-miR-542-3p        | 0.02170116                               | 29.07343157                   | 0.3242  | 31.37939037                     | 0.48435 |
| <b>mmu-miR-678</b>    | 0.03636432                               | 28.67922568                   | 0.73793 | 25.25732209                     | 0.81617 |
| <b>mmu-miR-704</b>    | 0.0022794                                | 30.44075651                   | 0.67965 | 24.06070021                     | 0.50225 |
| mmu-miR-706           | 0.00065083                               | 25.81463724                   | 0.31413 | 19.51522158                     | 0.13268 |
| <b>mmu-miR-764-5p</b> | 0.00173685                               | 28.96795599                   | 0.37713 | 24.09059206                     | 0.48501 |
| <b>mmu-miR-801</b>    | 0.0003992                                | 28.5899812                    | 0.33538 | 21.55200503                     | 0.45802 |
| <b>mmu-miR-804</b>    | 0.00312153                               | 34.22378442                   | 0.40665 | 28.9506762                      | 0.60225 |
| <b>mmu-miR-877*</b>   | 0.01438495                               | 25.16743308                   | 0.58258 | 21.99930054                     | 0.44677 |
| mmu-miR-878-5p        | 0.02192809                               | 33.40739242                   | 0.44101 | 30.84035108                     | 0.5329  |
| <b>rno-miR-345-3p</b> | 0.00566844                               | 30.53389364                   | 0.06269 | 27.44359074                     | 0.27346 |
| rno-miR-463           | 0.0469897                                | 31.88116981                   | 0.53747 | 26.81581981                     | 1.32662 |

# Supplementary Figure 1

**A**

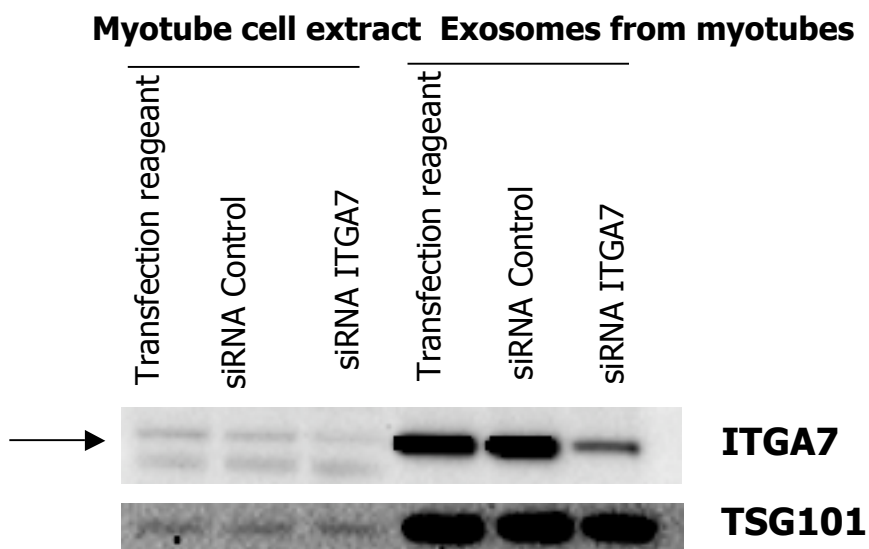

**B**

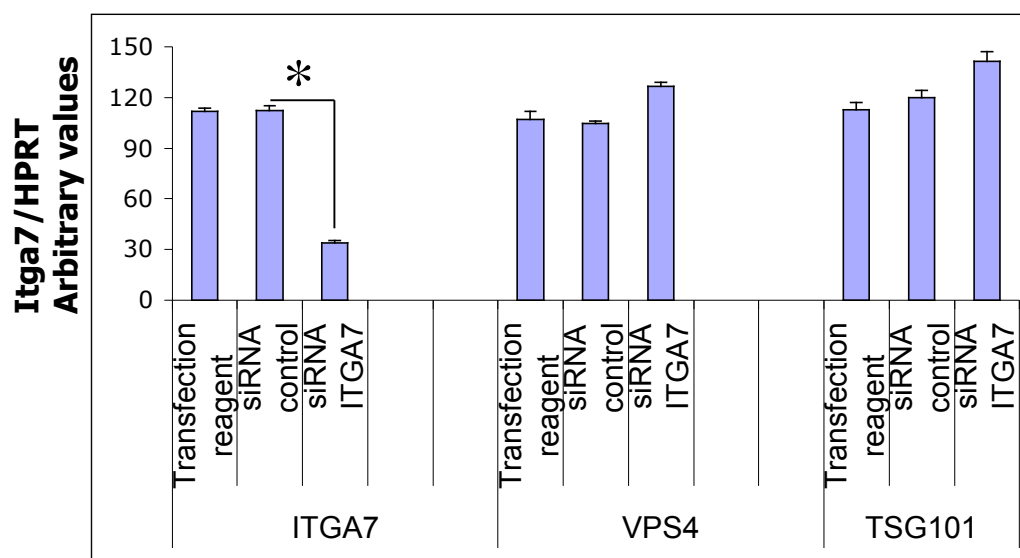

Supplementary data 1 : **A\_** Endogenous silencing of ITGA7 protein in C2C12 myotubes was validated by western-blot. ITGA7 was concomitantly down-regulated in exosomes as a consequence of its intracellular down-regulation. We controlled the expression of an exosomal marker (TSG101) to validate that siRNA overexpression did not reduce exosome synthesis. **B\_** Endogenous silencing of Itga7 in C2C12 myotubes at the mRNA level was also verified by qRT-PCR. mRNA levels of 2 other unrelated genes was also quantified as control (VPS4 and TG101 which are both involved in exosome formation). mRNA level of these control genes was not affected, indicating that alteration of Itga7 mRNA level in siRNA-transfected myotubes is specific.
